# Supplementary material for: Rapid and ordered carbonylation and oxygenation of a cobalt(ii) methyl
Source: Royal Society of Chemistry journal article supplement (doi:10.1039/c7cc06339c), 2017-01-01
Supplement: c7cc06339c1.pdf [file c7cc06339c1.pdf]

Electronic Supplementary Information for:

## Rapid and ordered carbonylation and oxygenation of a cobalt(II) methyl complex

Regina R. Reinig, Ellie L. Fought, Arkady Ellern, Theresa L. Windus, and Aaron D. Sadow\*

### Table of Contents:

|                                                                               |       |
|-------------------------------------------------------------------------------|-------|
| Experimental -----                                                            | S1    |
| <sup>1</sup> H and <sup>11</sup> B NMR spectra of <b>1</b> and <b>2</b> ----- | S2-3  |
| Infrared Spectroscopy of <b>1</b> and <b>2</b> -----                          | S4    |
| UV-Vis Spectroscopy -----                                                     | S5-7  |
| EPR spectra and simulations of <b>1</b> and <b>2</b> -----                    | S8-9  |
| DFT Calculations -----                                                        | S9-16 |
| References -----                                                              | S16   |

### Experimental

#### General experimental methods

All reactions were performed using standard Schlenk techniques under an atmosphere of dry argon. Benzene and diethyl ether were dried and deoxygenated using an IT PureSolv system. Benzene-*d*<sub>6</sub> was degassed with freeze-pump-thaw cycles, heated to reflux over a Na/K alloy, and then vacuum transferred. To<sup>M</sup>CoCl and To<sup>M</sup>CoOAc (**3**) were synthesized following the reported procedures.<sup>1</sup> <sup>1</sup>H and <sup>11</sup>B NMR spectra were collected on a Bruker Avance III 600 spectrometer. <sup>11</sup>B NMR spectra were referenced to an external sample of BF<sub>3</sub>·Et<sub>2</sub>O. Infrared spectra were measured on a Bruker Vertex 80 FTIR spectrometer. EPR were obtained on an X-band Elexsys 580 FT- EPR spectrometer in continuous wave mode, and the spectra simulated using XSophe. UV-Vis spectra were recorded on an Agilent 8453 UV-vis spectrophotometer. The electronic spectrum of To<sup>M</sup>CoOAc was not previously disclosed and is reported here. Elemental analyses were performed using a Perkin-Elmer 2400 Series II CHN/S. Single crystal X-ray diffraction data was collected on an APEX II.

**To<sup>M</sup>CoMe (1).** Methyllithium (1.6 M in diethyl ether, 1.00 mL, 1.6 mmol) was added to a solution of To<sup>M</sup>CoCl (0.510 g, 1.07 mmol) in benzene (50 mL). The green reaction mixture was stirred for 1.5 h, the salt byproduct was removed by filtration, and the solvent was evaporated to afford To<sup>M</sup>CoMe as a dark aquamarine solid (0.353 g, 0.773 mmol, 72%). X-ray quality crystals were obtained from pentane at -40 °C. <sup>1</sup>H NMR (benzene-*d*<sub>6</sub>, 600 MHz): δ 15.44 (s, 6 H, CNCMe<sub>2</sub>CH<sub>2</sub>O), 14.18 (s, 2 H, C<sub>6</sub>H<sub>5</sub>), 10.61 (s, 2 H, C<sub>6</sub>H<sub>5</sub>), 8.88 (s, 1 H, *p*-C<sub>6</sub>H<sub>5</sub>), -12.05 (s, 18 H, CNCMe<sub>2</sub>CH<sub>2</sub>O). <sup>11</sup>B NMR (benzene-*d*<sub>6</sub>, 128 MHz): δ 100.3. IR (KBr, cm<sup>-1</sup>): ν 2967 (m), 2925 (m), 2897 (m), 2861 (m), 1594 (s, ν<sub>CN</sub>), 1462 (m), 1386 (m), 1352 (m), 1269 (m), 1194 (m), 1160 (m), 960 (m). UV-vis (Et<sub>2</sub>O) λ<sub>max</sub> = 346 (ε: 1412 M<sup>-1</sup>cm<sup>-1</sup>), 581 (ε: 388 M<sup>-1</sup>cm<sup>-1</sup>), 617 (ε: 424 M<sup>-1</sup>cm<sup>-1</sup>), 697 (ε: 1078 M<sup>-1</sup>cm<sup>-1</sup>). μ<sub>eff</sub> (C<sub>6</sub>D<sub>6</sub>) = 4.2(2) μ<sub>B</sub> as determined by the Evans method. Anal. Calcd. for C<sub>22</sub>H<sub>32</sub>BCoN<sub>3</sub>O<sub>3</sub>: C, 57.91; H, 7.07; N, 9.21 Found: C, 57.93; H, 7.18; N, 9.20. Mp. 235-237 °C, dec.

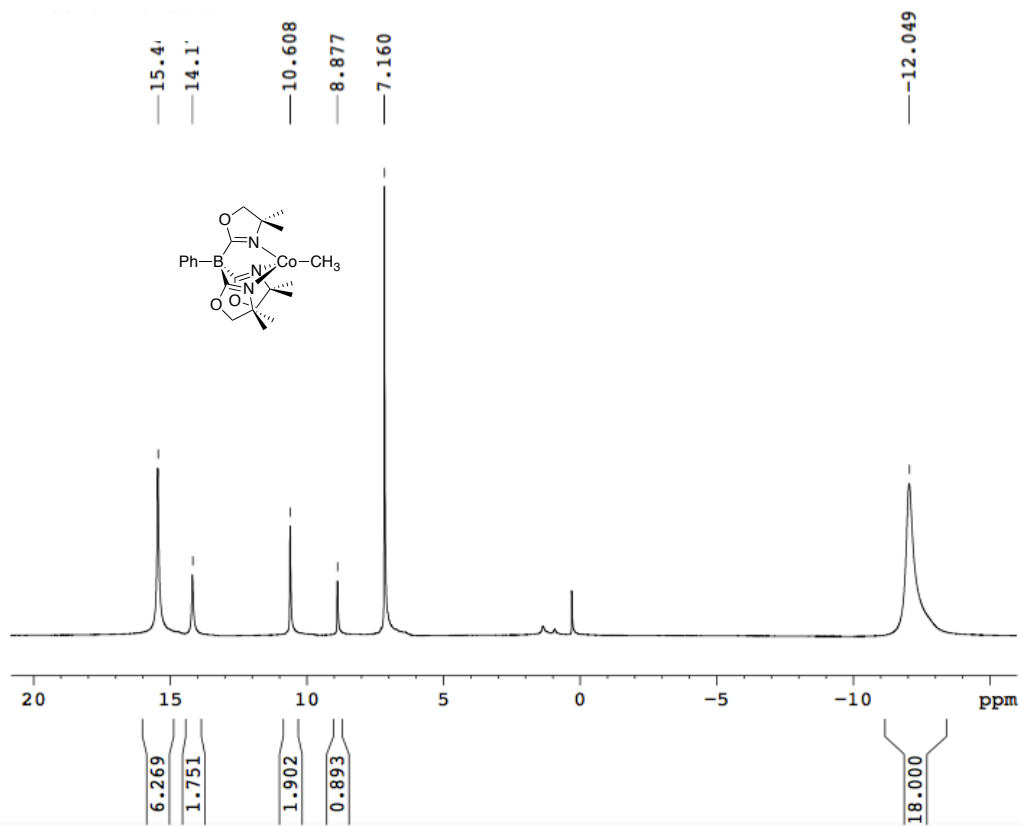

**Figure S1.**  $^1\text{H}$  NMR spectrum of  $\text{To}^{\text{M}}\text{CoMe}$  (1) acquired in benzene- $d_6$  at room temperature.

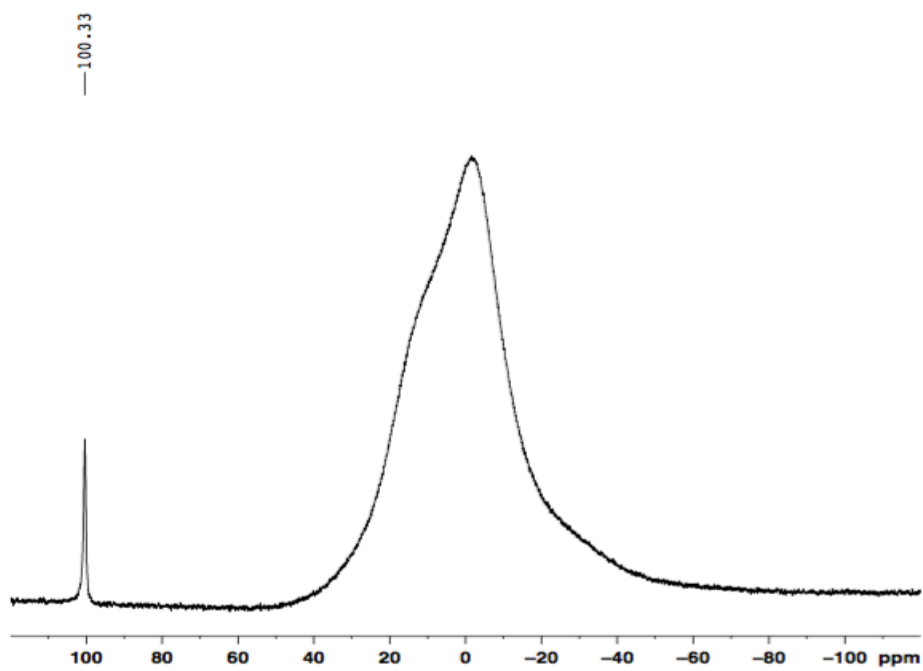

**Figure S2.**  $^{11}\text{B}$  NMR spectrum of  $\text{To}^{\text{M}}\text{CoMe}$  (1) acquired in benzene- $d_6$  at room temperature.

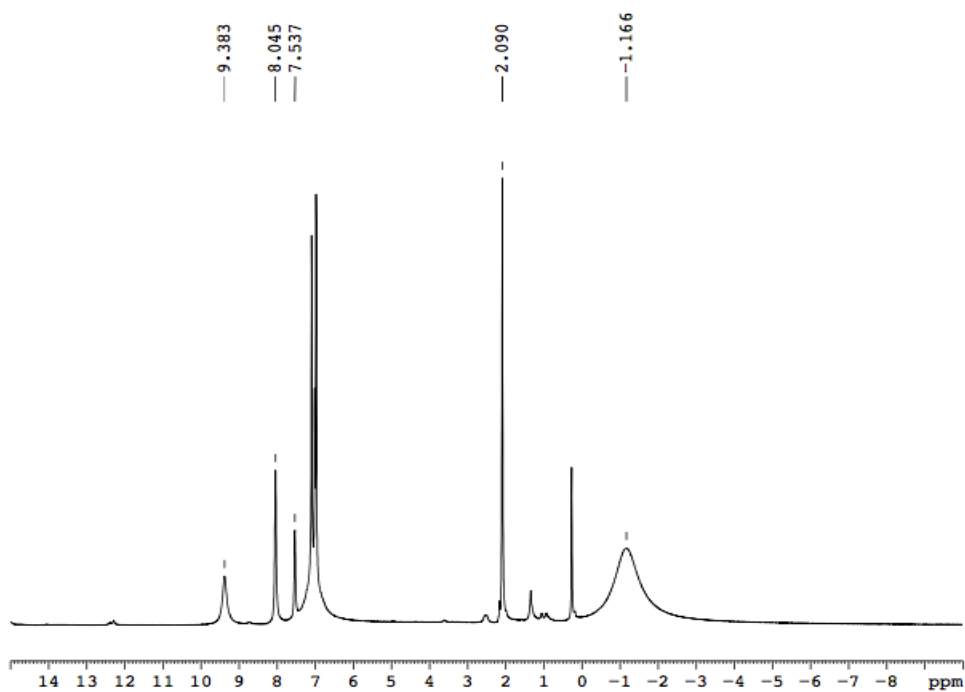

**Figure S3.**  $^1\text{H}$  NMR spectrum of  $\text{To}^{\text{M}}\text{Co}(\text{CMe}=\text{O})\text{CO}$  (**2**) acquired in toluene- $d_8$  at room temperature.

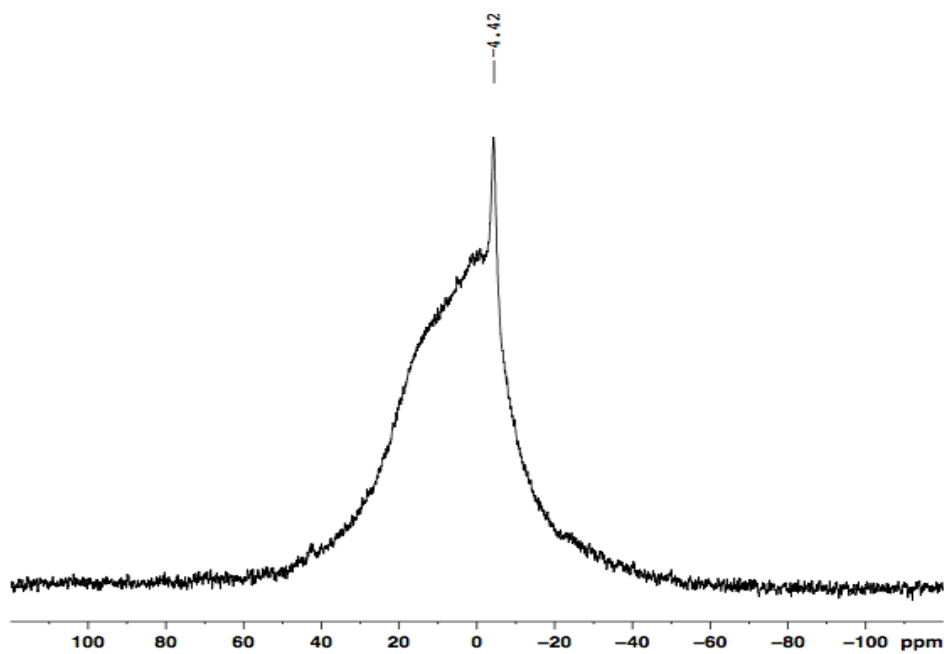

**Figure S4.**  $^{11}\text{B}$  NMR spectrum of  $\text{To}^{\text{M}}\text{Co}(\text{CMe}=\text{O})\text{CO}$  (**2**) acquired in toluene- $d_8$  at room temperature.

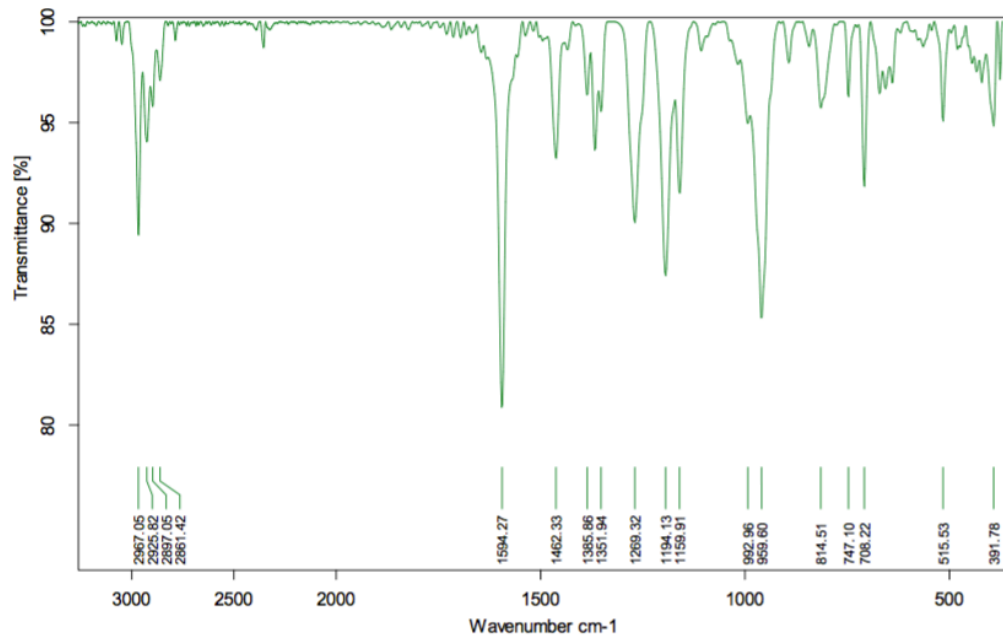

**Figure S5.** Infrared spectrum (KBr) of To<sup>M</sup>CoMe (**1**).

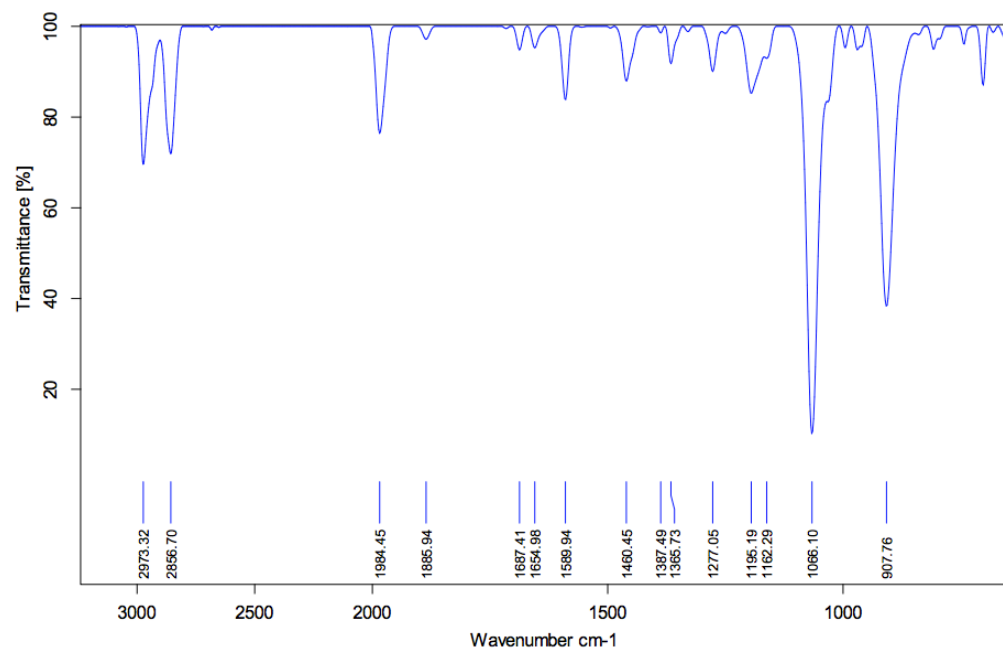

**Figure S6.** Infrared spectrum (ATR, ZnSe crystal) of To<sup>M</sup>Co(CMe=O)CO (**2**) in tetrahydrofuran.

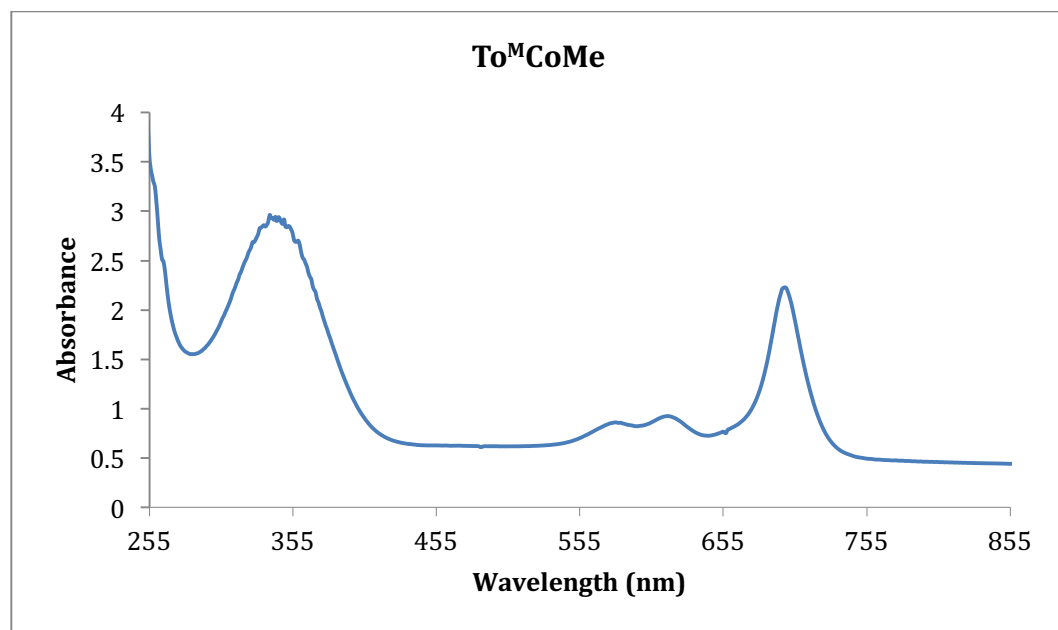

**Figure S7.** UV-Vis spectrum of To<sup>M</sup>CoMe (**1**) in Et<sub>2</sub>O.

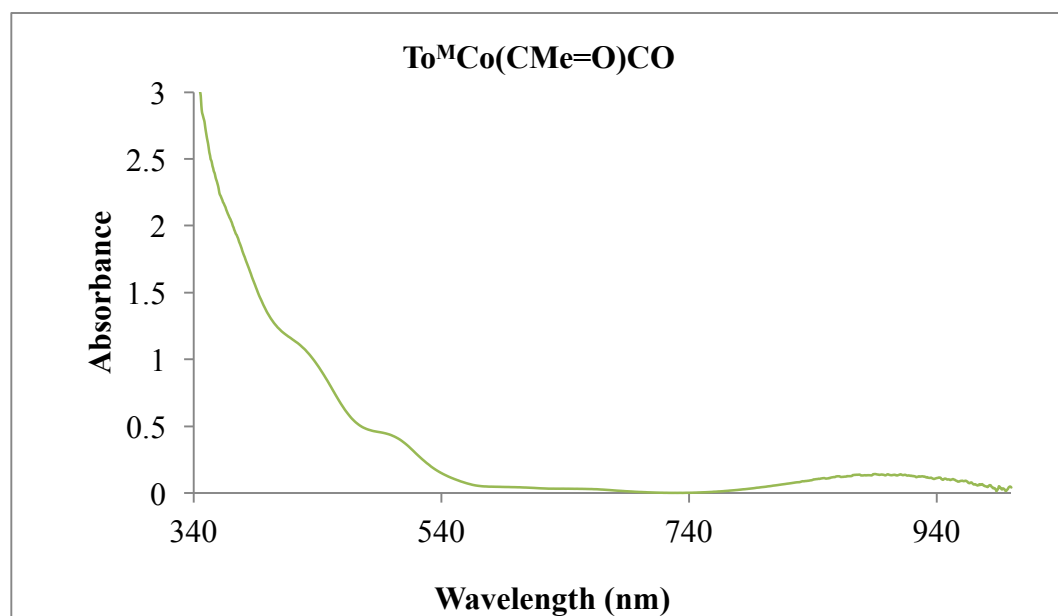

**Figure S8.** UV-Vis spectrum of To<sup>M</sup>Co(CMe=O)CO (**2**) in tetrahydrofuran at -100 °C.

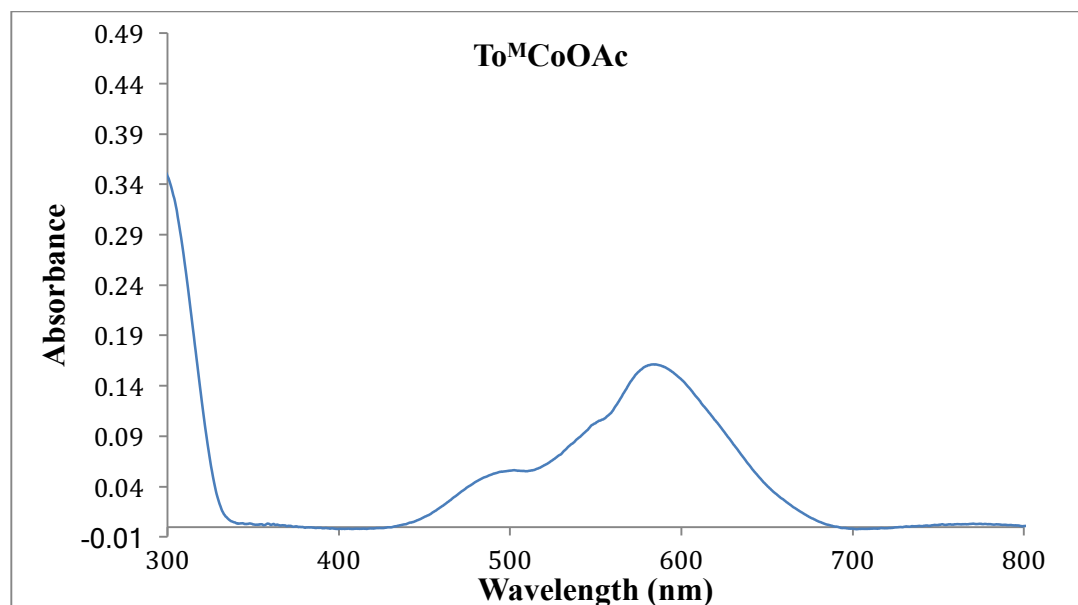

**Figure S9.** UV-Vis spectrum of crystals of  $\text{To}^{\text{M}}\text{CoOAc}$  (**3**) in tetrahydrofuran at room temperature.

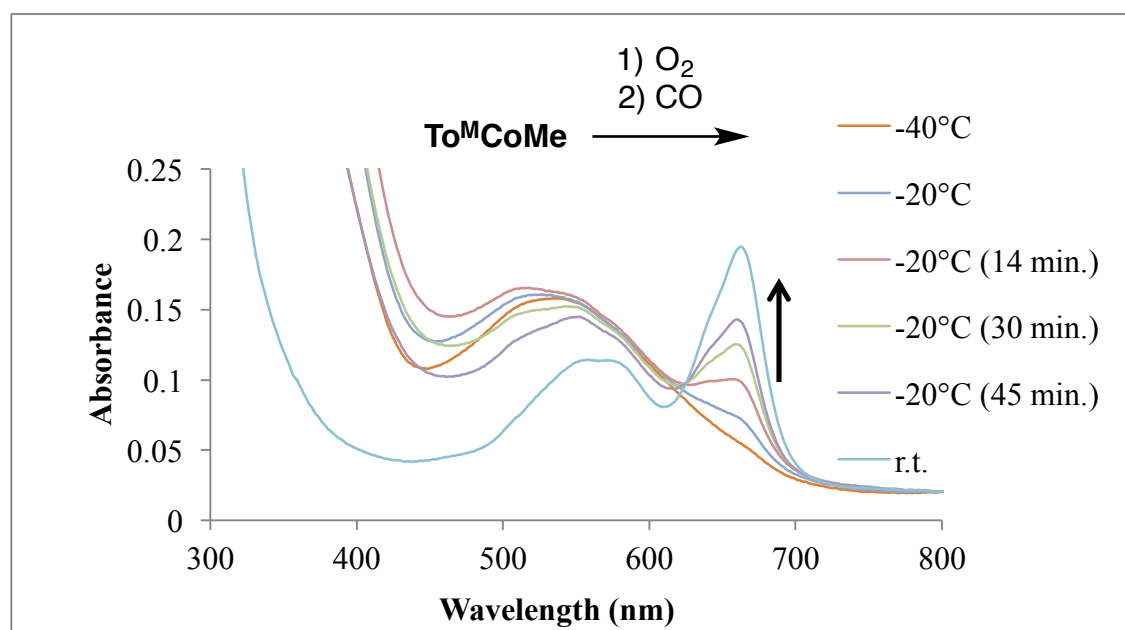

**Figure S10.** UV-Vis spectrum of  $\text{To}^{\text{M}}\text{CoMe}$  reacted with  $\text{O}_2$  at  $-100\text{ }^\circ\text{C}$  followed by addition of  $\text{CO}$  at  $-100\text{ }^\circ\text{C}$  in tetrahydrofuran. The reaction was monitored as the reaction warmed up to room temperature.

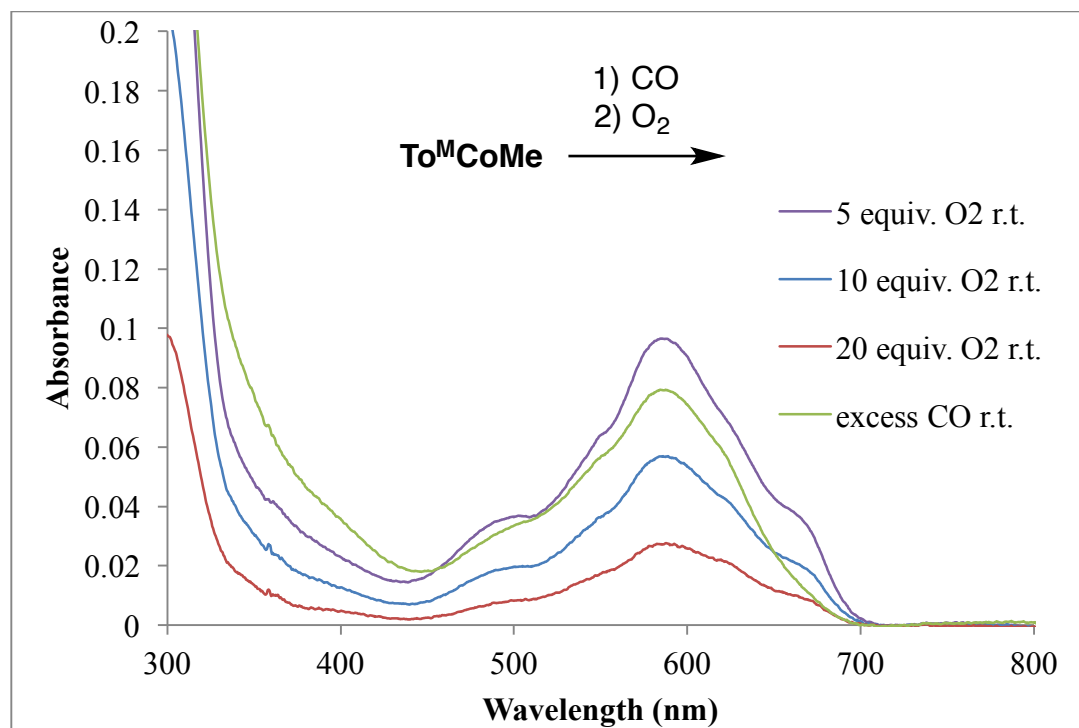

**Figure S11.** UV-Vis spectrum of  $\text{To}^{\text{M}}\text{CoMe}$  reacted with CO at room temperature followed by addition of O<sub>2</sub> at room temperature in tetrahydrofuran.

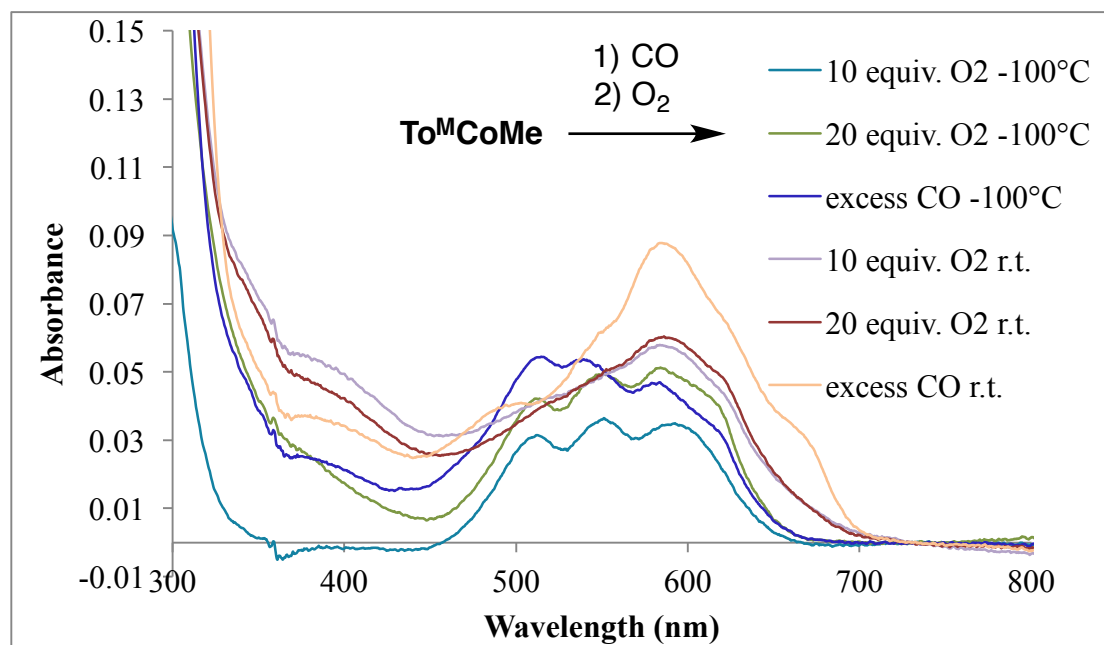

**Figure S12.** UV-Vis spectrum of  $\text{To}^{\text{M}}\text{CoMe}$  reacted with CO at room temperature followed by addition of O<sub>2</sub> at -100 °C in tetrahydrofuran ( $\lambda_{\text{max}} = \text{c.a. } 510, 550, \text{ and } 585 \text{ nm}$ ). The reaction was monitored again after allowing the solution to warm to room temperature ( $\lambda_{\text{max}} = \text{c.a. } 585 \text{ nm}$ ).

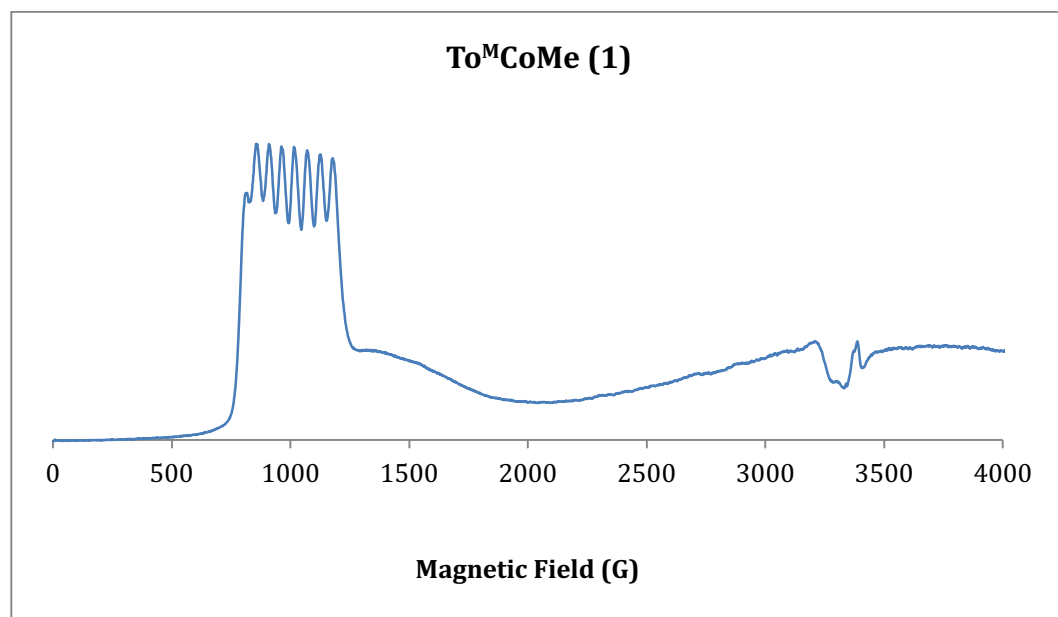

**Figure S13.** X-Band EPR spectrum of  $\text{To}^{\text{M}}\text{CoMe (1)}$  in toluene at 5 K.

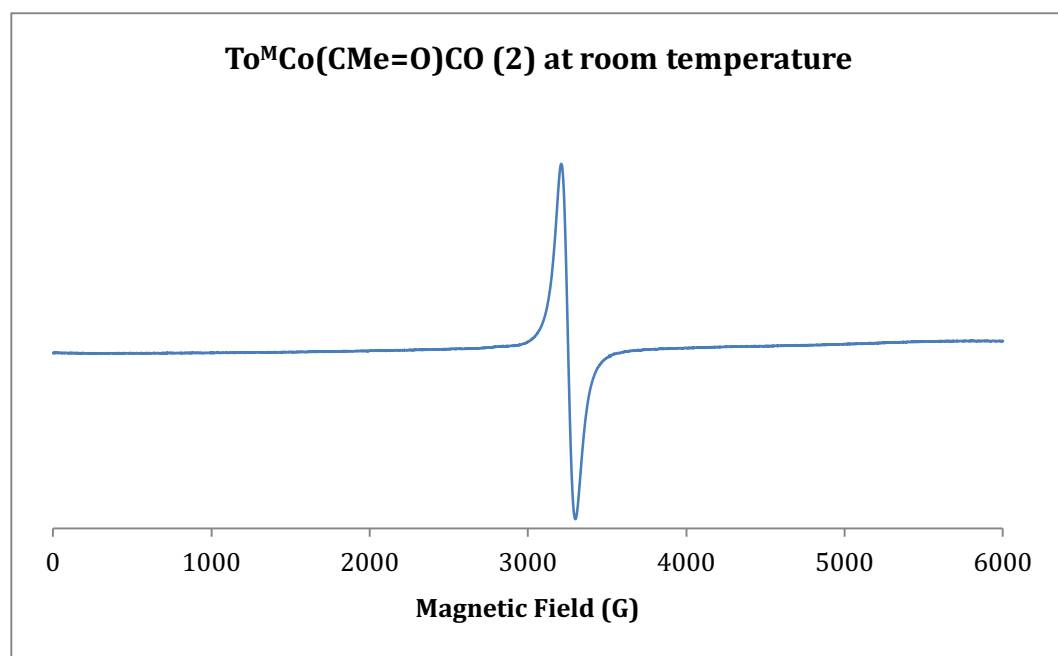

**Figure S14.** X-Band EPR spectrum of  $\text{To}^{\text{M}}\text{Co(CMe=O)CO (2)}$  in tetrahydrofuran at room temperature.



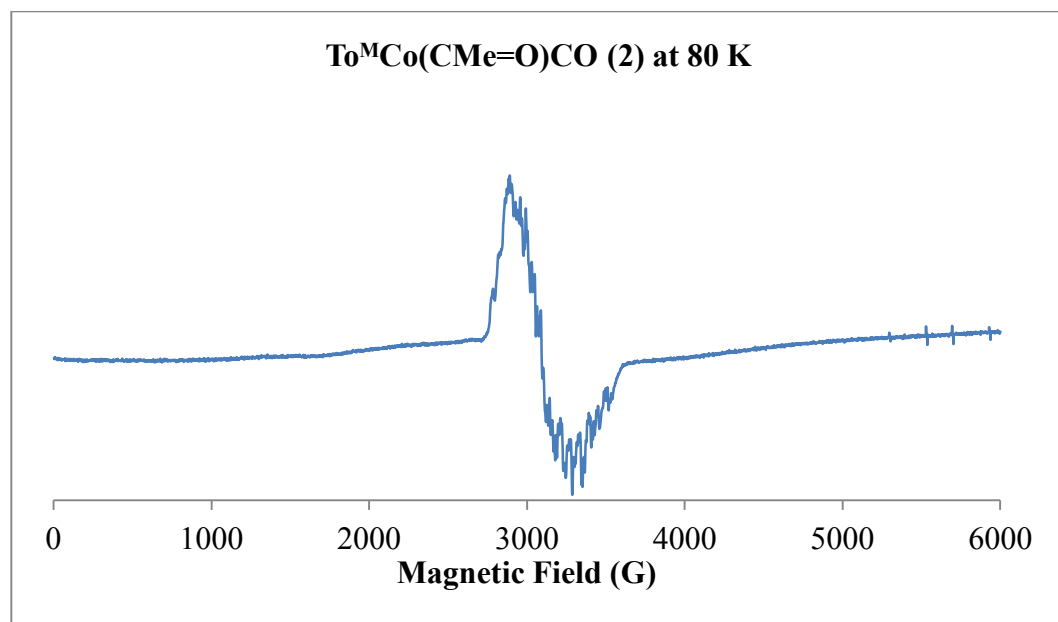

**Figure S15.** X-Band EPR spectrum of  $\text{To}^{\text{M}}\text{Co}(\text{CMe}=\text{O})\text{CO}$  (**2**) in tetrahydrofuran at 80 K.

DFT Calculations: Cartesian Coordinates For All Structures

Cartesian coordinates, chemical formulas, and single point energy values are provided for high spin and low spin calculations.

All optimization, Hessian, and energy calculations were performed using the 6-311+g\* basis set<sup>5</sup> and the PBE<sup>6</sup> functional using the NWChem<sup>7</sup> Computational Chemistry suite. Cartesian coordinates are in units of angstroms. All TDDFT calculations were performed using the same functional and basis set, both with and without a COSMO solvation model for THF.<sup>8</sup> The results both with and without the solvation were essentially identical.

**Table S1.**  $\text{To}^{\text{M}}\text{CoMe}$  starting material:  $\text{C}_{22}\text{H}_{32}\text{BCoN}_3\text{O}_3$ .

| Element | X           | Y           | Z           |
|---------|-------------|-------------|-------------|
| Co      | 0.15651852  | 1.94540046  | -0.24177561 |
| B       | -0.08445358 | -1.14746571 | 0.1672626   |
| C       | -1.94585137 | 1.64555321  | -3.37999209 |
| H       | -1.51255827 | 2.62858554  | -3.17696209 |
| H       | -2.79524755 | 1.78264459  | -4.05707929 |
| H       | -1.19262645 | 1.04092551  | -3.89236591 |
| C       | -2.38701175 | 0.97861342  | -2.0838946  |
| C       | -3.39949046 | 1.84918339  | -1.34523053 |
| H       | -3.7249667  | 1.36818558  | -0.41836705 |

|   |             |             |             |
|---|-------------|-------------|-------------|
| H | -4.28302424 | 2.03062372  | -1.96586077 |
| H | -2.9585922  | 2.81689809  | -1.09072603 |
| C | -2.90575037 | -0.4580846  | -2.30505599 |
| H | -3.96100075 | -0.58686534 | -2.05582981 |
| H | -2.73160877 | -0.82047118 | -3.32252276 |
| C | -1.17761811 | -0.50598811 | -0.87723162 |
| C | -1.90755514 | 2.29084949  | 2.84088158  |
| H | -1.79200617 | 3.15549687  | 2.1817113   |
| H | -2.20120544 | 2.65472525  | 3.83086781  |
| H | -2.71823072 | 1.66959471  | 2.4495833   |
| C | -0.60445937 | 1.50061836  | 2.91796817  |
| C | 0.51989748  | 2.36691325  | 3.47076398  |
| H | 1.46261182  | 1.81345801  | 3.49486408  |
| H | 0.29117119  | 2.7001312   | 4.48826316  |
| H | 0.66132848  | 3.25397638  | 2.84758853  |
| C | -0.76879985 | 0.18015372  | 3.6976593   |
| H | 0.03053946  | 0.01305959  | 4.42532645  |
| H | -1.73469053 | 0.08297365  | 4.19757934  |
| C | -0.33787379 | -0.27780455 | 1.53891183  |
| C | 3.2709706   | 1.39959246  | -2.32023793 |
| H | 2.7128933   | 0.87813844  | -3.10260244 |
| H | 4.32471987  | 1.43475003  | -2.61531232 |
| H | 2.90045772  | 2.42673092  | -2.26477759 |
| C | 3.10616189  | 0.69982722  | -0.97795948 |
| C | 3.84272754  | 1.45864468  | 0.1223799   |
| H | 3.44279624  | 2.47141285  | 0.2224168   |
| H | 4.91094521  | 1.53546276  | -0.1052048  |
| H | 3.73283738  | 0.95228099  | 1.08566807  |
| C | 3.51244551  | -0.78795369 | -1.03205844 |
| H | 3.69006655  | -1.14220872 | -2.05183146 |
| H | 4.37951189  | -1.02913662 | -0.41388293 |
| C | 1.38032276  | -0.62705359 | -0.36057544 |
| N | -1.22639638 | 0.73568063  | -1.21337476 |
| N | -0.25430833 | 1.00630952  | 1.57794734  |
| N | 1.68184764  | 0.59591162  | -0.62526237 |

|   |             |             |             |
|---|-------------|-------------|-------------|
| O | -2.1358354  | -1.27753823 | -1.40987246 |
| O | -0.67936619 | -0.85482838 | 2.70309952  |
| O | 2.38195578  | -1.50514468 | -0.50982969 |
| C | 0.298957    | 3.93037902  | -0.48450566 |
| C | -0.14805185 | -2.75618438 | 0.22818691  |
| C | -0.24286154 | -3.52060294 | 1.39631093  |
| C | -0.25071449 | -4.91394012 | 1.36386075  |
| C | -0.16125121 | -5.59011811 | 0.15501154  |
| C | -0.06170287 | -4.85611937 | -1.02287716 |
| C | -0.0555931  | -3.4686073  | -0.97722153 |
| H | -0.31630314 | -3.02586425 | 2.35741011  |
| H | -0.32761662 | -5.47176824 | 2.29389097  |
| H | -0.16781907 | -6.67643962 | 0.12807535  |
| H | 0.01108102  | -5.36768158 | -1.97936813 |
| H | 0.0241079   | -2.92330744 | -1.91551612 |
| H | 1.09116343  | 4.38056125  | 0.13203464  |
| H | -0.62672407 | 4.4636784   | -0.22115361 |
| H | 0.5260448   | 4.21506298  | -1.52243717 |

### Density Functional Theory Single Point Energies

Doublet (low) = -1417.005732 hartree

Quartet (high) = -1417.084129 hartree

Delta E = 49 kcal/mol between two spin configurations (favoring the quartet)

**Table S2.** To<sup>M</sup>Co(Me)CO: C<sub>23</sub>H<sub>32</sub>BCoN<sub>3</sub>O<sub>4</sub>

| Element | X           | Y           | Z           |
|---------|-------------|-------------|-------------|
| Co      | 0.18895951  | 1.80355962  | 0.20859267  |
| B       | -0.00031418 | -1.35522619 | -0.12569667 |
| C       | -3.6577186  | 1.36572856  | 0.66204991  |
| H       | -3.32589883 | 2.34803735  | 0.31806156  |
| H       | -4.63862174 | 1.48919393  | 1.13307444  |
| H       | -3.77746995 | 0.72094877  | -0.21345698 |
| C       | -2.65908943 | 0.76263196  | 1.64836538  |
| C       | -2.52127098 | 1.64268236  | 2.88069384  |
| H       | -1.76221096 | 1.24840182  | 3.56097389  |
| H       | -3.47224963 | 1.69386715  | 3.42143611  |
| H       | -2.23549915 | 2.66060266  | 2.60862157  |
| C       | -3.04098315 | -0.68265194 | 2.01716623  |
| H       | -2.8492312  | -0.90950519 | 3.07147812  |
| H       | -4.07363849 | -0.94276253 | 1.77691571  |
| C       | -1.21481646 | -0.698856   | 0.73353062  |
| C       | 3.04540154  | 0.90224625  | 2.75681712  |
| H       | 2.63092017  | 1.88211944  | 2.99030916  |
| H       | 4.08126838  | 0.87977618  | 3.1119579   |
| H       | 2.48021024  | 0.1496752   | 3.31426915  |
| C       | 3.00437946  | 0.60756285  | 1.25823266  |
| C       | 3.74622578  | 1.67613225  | 0.4674928   |
| H       | 3.70214136  | 1.46793183  | -0.60515182 |
| H       | 4.79970047  | 1.71285336  | 0.76357443  |
| H       | 3.31755478  | 2.66552591  | 0.64142288  |
| C       | 3.56841724  | -0.79797423 | 0.97691435  |
| H       | 4.21395222  | -0.82831106 | 0.09279739  |
| H       | 4.10184455  | -1.23197646 | 1.82428855  |
| C       | 1.38131339  | -0.7837984  | 0.52042556  |
| C       | -1.39846662 | 1.78393423  | -3.25134948 |
| H       | -2.16022595 | 1.0252742   | -3.05079592 |
| H       | -1.47237059 | 2.07356921  | -4.30469993 |
| H       | -1.62980586 | 2.6635324   | -2.6486031  |
| C       | -0.00295596 | 1.24281286  | -2.94581659 |

|   |             |             |             |
|---|-------------|-------------|-------------|
| C | 1.06606842  | 2.28402566  | -3.23817092 |
| H | 0.88805342  | 3.20046308  | -2.6693617  |
| H | 1.0683067   | 2.54955298  | -4.30017164 |
| H | 2.05951566  | 1.90889746  | -2.97790739 |
| C | 0.24839262  | -0.07318289 | -3.69803991 |
| H | -0.42069571 | -0.23418776 | -4.54457365 |
| H | 1.2865404   | -0.17563073 | -4.03191216 |
| C | 0.00506855  | -0.50900092 | -1.51925414 |
| N | -1.3660746  | 0.5553729   | 0.96332616  |
| N | 1.60961843  | 0.45951339  | 0.7742402   |
| N | 0.06313519  | 0.77720136  | -1.54370834 |
| O | -2.17465799 | -1.50364882 | 1.22490737  |
| O | 2.41973705  | -1.6097274  | 0.70530824  |
| O | -0.00089198 | -1.09915522 | -2.72556777 |
| C | 0.51659335  | 2.94588732  | 1.80726631  |
| C | -0.10645999 | -2.95847548 | -0.19504041 |
| C | 0.27741808  | -3.72844402 | 0.91221374  |
| C | 0.12828431  | -5.10963842 | 0.9417095   |
| C | -0.419718   | -5.77501932 | -0.14971626 |
| C | -0.81652162 | -5.03843893 | -1.25824485 |
| C | -0.6625675  | -3.65445409 | -1.27512877 |
| H | 0.70808069  | -3.23833213 | 1.7818744   |
| H | 0.44073458  | -5.66930551 | 1.81982529  |
| H | -0.53773607 | -6.85517535 | -0.13396108 |
| H | -1.2505914  | -5.54219013 | -2.11842258 |
| H | -0.98191774 | -3.11100208 | -2.15774876 |
| C | -0.69614839 | 3.23655439  | -0.24266953 |
| O | -1.26133102 | 4.20651674  | -0.45859404 |
| H | 0.50856316  | 2.24577846  | 2.64444104  |
| H | 1.50897232  | 3.40489848  | 1.73044498  |
| H | -0.18246654 | 3.75343505  | 2.0438029   |

**Density Functional Theory Single Point Energies**

Doublet (low spin) = -1530.305323 hartree

Quartet (high spin) = -1530.257968 hartree

Delta E = 30 kcal/mol between two spin configurations (favoring the doublet)

**Table S3.** To<sup>M</sup>Co(CMe=O)CO (**2**): C<sub>24</sub>H<sub>32</sub>BCoN<sub>3</sub>O<sub>5</sub>

| Element | X           | Y           | Z           |
|---------|-------------|-------------|-------------|
| Co      | 0.00457031  | 1.66928008  | -0.07021966 |
| B       | 0.07960781  | -1.51000167 | -0.07942578 |
| C       | -3.72333231 | 1.57353909  | 0.64370148  |
| H       | -3.31861383 | 2.54852565  | 0.92590027  |
| H       | -4.76713782 | 1.54545447  | 0.97298879  |
| H       | -3.71095356 | 1.4997161   | -0.44683659 |
| C       | -2.93582807 | 0.44107389  | 1.27918959  |
| C       | -2.90062478 | 0.58807133  | 2.79967738  |
| H       | -2.34460908 | -0.23626304 | 3.2555426   |
| H       | -3.91730317 | 0.5785838   | 3.20672639  |
| H       | -2.42927147 | 1.52410137  | 3.099527    |
| C       | -3.49844807 | -0.93408091 | 0.89436855  |
| H       | -4.09556651 | -1.40405508 | 1.67752914  |
| H       | -4.07959005 | -0.90498582 | -0.0349543  |
| C       | -1.30674376 | -0.88917521 | 0.49424341  |
| C       | 2.78766589  | 1.60805434  | 2.6456827   |
| H       | 2.50522254  | 2.64929256  | 2.49875016  |
| H       | 3.7939657   | 1.60112791  | 3.07836297  |
| H       | 2.11092611  | 1.15023579  | 3.37246954  |
| C       | 2.79621211  | 0.82064342  | 1.33995169  |
| C       | 3.59808017  | 1.55356637  | 0.26846241  |
| H       | 3.65373351  | 0.95891354  | -0.64846575 |
| H       | 4.62020345  | 1.73856023  | 0.61532692  |
| H       | 3.13919131  | 2.51693492  | 0.03558332  |
| C       | 3.34251625  | -0.59821092 | 1.59589868  |
| H       | 4.2953813   | -0.79461421 | 1.09945729  |
| H       | 3.44179127  | -0.82451318 | 2.66139173  |
| C       | 1.31299133  | -0.75466615 | 0.66522419  |
| C       | -1.12596692 | 1.10214812  | -3.72360634 |
| H       | -1.83137576 | 0.28327721  | -3.55546972 |
| H       | -1.06061682 | 1.28108394  | -4.801727   |
| H       | -1.5350889  | 2.00317441  | -3.26342508 |
| C       | 0.25002967  | 0.75578034  | -3.15749756 |

|   |             |             |             |
|---|-------------|-------------|-------------|
| C | 1.24477308  | 1.87956926  | -3.40486746 |
| H | 0.89128229  | 2.82101913  | -2.97578714 |
| H | 1.38923002  | 2.03997996  | -4.47808667 |
| H | 2.21632437  | 1.65045052  | -2.9596281  |
| C | 0.74319665  | -0.59144881 | -3.7097863  |
| H | 0.23324705  | -0.91086415 | -4.61975346 |
| H | 1.82558271  | -0.60842964 | -3.87520017 |
| C | 0.20669876  | -0.83494    | -1.55459188 |
| N | -1.5507402  | 0.34836018  | 0.74893743  |
| N | 1.43553212  | 0.52154704  | 0.81738787  |
| N | 0.13620594  | 0.4397907   | -1.71683597 |
| O | -2.3385953  | -1.73838083 | 0.66490395  |
| O | 2.36342175  | -1.4863555  | 1.04882609  |
| O | 0.44644762  | -1.53904986 | -2.67152457 |
| C | 0.35085187  | 3.0727064   | 1.17985062  |
| C | 0.11106508  | -3.11226631 | 0.0591664   |
| C | 0.29064213  | -3.68205993 | 1.32772045  |
| C | 0.25378026  | -5.05503366 | 1.53571453  |
| C | 0.03076316  | -5.91500003 | 0.46526493  |
| C | -0.15611866 | -5.37948779 | -0.80213621 |
| C | -0.11766888 | -4.00075822 | -0.99730903 |
| H | 0.46552882  | -3.03499271 | 2.18459802  |
| H | 0.39957937  | -5.45601021 | 2.53557116  |
| H | 0.00101622  | -6.99026767 | 0.61926148  |
| H | -0.33418242 | -6.0378963  | -1.64869787 |
| H | -0.26774385 | -3.61625849 | -2.00011566 |
| C | -0.31675617 | 3.19504359  | 2.52490579  |
| O | 1.20807385  | 3.85736695  | 0.8323658   |
| H | -0.29963034 | 2.23519746  | 3.04444193  |
| H | -1.36793843 | 3.4629666   | 2.3753822   |
| H | 0.16665092  | 3.96806782  | 3.12861428  |
| C | -1.04662936 | 2.89557525  | -0.78893716 |
| O | -1.71208025 | 3.71951773  | -1.21080679 |

### Density Functional Theory Single Point Energies

Doublet (low spin) = -1643.554558 hartree

Quartet (high spin) = -1643.501237 hartree

Delta E = 33 kcal/mol between two spin configurations (favoring the doublet)

### References.

1. R. R. Reinig, D. Mukherjee, Z. B. Weinstein, W. Xie, T. Albright, B. Baird, T. S. Gray, A. Ellern, G. J. Miller, A. H. Winter, S. L. Bud'ko and A. D. Sadow, *Eur. J. Inorg. Chem.*, 2016, 2486-2494.
2. R. Ditchfield, W. J. Hehre and J. A. Pople, *J. Chem. Phys.*, 1971, **54**, 724-728.
3. W. J. Hehre, R. Ditchfield and J. A. Pople, *J. Chem. Phys.*, 1972, **56**, 2257-2261.
4. M. M. Francl, W. J. Pietro, W. J. Hehre, J. S. Binkley, M. S. Gordon, D. J. DeFrees and J. A. Pople, *J. Chem. Phys.*, 1982, **77**, 3654-3665.
5. R. Krishnan, J. S. Binkley, R. Seeger and J. A. Pople, *J. Chem. Phys.*, 1980, **72**, 650-654.
6. J. P. Perdew, M. Ernzerhof and K. Burke, *J. Chem. Phys.*, 1996, **105**, 9982-9985.
7. M. Valiev, E. J. Bylaska, N. Govind, K. Kowalski, T. P. Straatsma, H. J. J. Van Dam, D. Wang, J. Nieplocha, E. Apra, T. L. Windus and W. A. de Jong, *Comput. Phys. Commun.*, 2010, **181**, 1477-1489.
8. A. Klamt and G. Schuurmann, *J. Chem. Soc.; Perkin Trans.*, 1993, 799-805.
